# Supplementary material for: Optical Properties of BPP and DPP Spiro-cyclotriphosphazenes: Experimental and DFT Insights
Source: Research Square preprint supplement (doi:10.21203/rs.3.rs-7885565/v1), 2025-10-24
Supplement: Supplementary file 1 [file 1cfda084f92a377b3ba12e9f.docx]

**Characterization of 2,2-Dichloro-4,4,6,6-Bis[Spiro(2',2"-Dioxy-1',1"-Biphenylyl) Cyclotriphosphazene (DPP)**

FT-IR spectrum of **DPP** compound (KBr disk)

31P-NMR spectrum of **DPP** compound (CDCl3-d1)

1H-NMR spectrum of **DPP** compound (CDCl3-d1)

13C-NMR spectrum of **DPP** compound (CDCl3-d1)

**Characterization of 2,2,4,4-Tetrachloro-6,6-[Spiro(2′,2″-Dioxy-1′,1″-Biphenyl)] cyclotriphosphazene (BPP)**

FT-IR spectrum of **BPP** compound (KBr disk)

31P-NMR spectrum of **BPP** compound (CDCl3-d1)

1H-NMR spectrum of **BPP** compound (CDCl3-d1)

13C-NMR spectrum of **BPP** compound (CDCl3-d1)
